## Identification of *Giardia lamblia* Assemblage E in Humans Points to a New Anthrozoonotic Cycle

Maria Fantinatti,<sup>1</sup> Alexandre R. Bello,<sup>2</sup> Octavio Fernandes,<sup>1</sup> and Alda M. Da-Cruz<sup>1,2</sup>

<sup>1</sup>Laboratório Interdisciplinar de Pesquisas Médicas, Instituto Oswaldo Cruz, Fundação Oswaldo Cruz, and <sup>2</sup>Disciplina de Parasitologia, DMIP, Faculdade de Ciências Médicas, Universidade do Estado do Rio de Janeiro, Rio de Janeiro, Brazil

*Giardia lamblia* is a pathogen transmitted by water and food that causes infection worldwide. *Giardia* genotypes are classified into 8 assemblages (A–H). Assemblages A and B are detected in humans, but they are potentially zoonotic because they infect other mammalian hosts. *Giardia* in samples from 44 children was genotyped. Conserved fragments of the genes encoding  $\beta$ -*giardin* and glutamate dehydrogenase were sequenced and their alignment were carried out with sequences deposited in GenBank. As expected for Rio de Janeiro, the majority of samples were related to assemblage A. Surprisingly, assemblage E was detected in 15 samples. Detection of assemblage E in humans suggests a new zoonotic route of *Giardia* transmission.

**Keywords.** *Giardia lamblia*;  $\beta$ -*giardin* gene; assemblage E; molecular characterization.

*Giardia lamblia* is a waterborne protozoan that infects the intestinal tract. Transmission occurs through the fecal-oral route, which is favored by substandard sanitation conditions and overcrowding. In developed countries, the estimated global distribution ranges from 2% to 7% of the population, but it can reach up to 30% of the population living in low-income countries [1]. Evidence of zoonotic transmission increases the risk for giardiasis.

Currently, 8 *G. lamblia* assemblages (A–H) are recognized. Assemblages A and B possess anthrozoonotic profiles because they have been described as infecting humans and other hosts, including dogs and cats. The other assemblages were identified in specific hosts: C and D were found in dogs; E, in grazing or herd animals; F, in cats; G, in rats and mice; and, more recently, H, in seals [1, 2].

As the genotypic characterization studies progress, evidence that a particular assemblage is able to infect hosts not yet described is mounting, which also suggests new transmission routes. In this way, assemblage E was recently described in rabbits, nonhuman primates, and humans [3, 4], while assemblage F was detected in cattle [5]. Herein, we evaluated the distribution of *G. lamblia* genotypes in children inhabiting an urban slum and suggest an additional route of anthrozoonotic fecal-oral transmission.

### MATERIALS AND METHODS

#### Subjects and Detection of Intestinal Parasites in Stool

The study was developed in a community of Rio de Janeiro, Brazil. The slum has a limited drinking water supply and no sewage network coverage, and few streets are paved. Stray animals, such as dogs, cats, rodents, pigs, horses, and cattle are commonly found moving throughout location. The community has a vegetable garden that is fertilized with feces of hooved animals.

All nursery attendees were invited to participate in this study. Samples were obtained from 89 of 95 preschoolers (age range, 10 months to 4 years) and 35 of 36 employees. A collector accompanied by instructions was provided for the guardians of children and nursery volunteers. One stool sample from each participant was examined for intestinal protozoa and helminthes. Biological samples were obtained after informed consent was obtained from each subject or guardians of the children. All the procedures were approved by the ethical committee for human research (Instituto Oswaldo Cruz, Fundação Oswaldo Cruz).

#### Molecular Characterization

*G. lamblia* DNA from cysts was extracted using the QIAmp DNA Stool Mini Kit (Qiagen, Germany), with modifications (lysis temperature, 95°C; elution buffer, 100  $\mu$ L). Purified DNA was stored at 4°C until use. Conserved fragments from the genes encoding glutamate dehydrogenase (*gdh*) and  $\beta$ -*giardin* (*βgia*) were amplified by polymerase chain reaction (PCR), as described elsewhere [6–8], except for the use of recombinant Taq DNA polymerase (Invitrogen, Brazil; [Supplementary Table 1](#)). A positive control consisted of DNA from an axenic culture of *G. lamblia* strain WB ATCC50803, and a negative control consisted of DNA from axenic cultures of *Trichomonas vaginalis* and *Entamoeba histolytica*.

The amplicons obtained for each pair of primers were purified using NucleoSpin Gel and a PCR Clean-up kit (Macherey-Nagel, Germany), with a minor change in incubation duration (increased to 5 minutes). The purified products were subjected to sequencing in both directions in triplicate, using the ABI

Received 6 June 2016; accepted 3 August 2016; published online 10 August 2016.

Presented in part: XXIVth Congresso da Sociedade Brasileira de Parasitologia - SBP; XXIIIth Congresso Latinoamericano de Parasitologia - FLAP, Salvador, Bahia, 27–31 October 2015. Abstract P307.

Correspondence: A. M. Da-Cruz, Laboratório Interdisciplinar de Pesquisas Médicas, Instituto Oswaldo Cruz, FIOCRUZ, Av. Brasil 4365, Manguinhos, Rio de Janeiro-RJ, Brazil (alda@ioc.fiocruz.br).

The Journal of Infectious Diseases® 2016;214:1256–9

© The Author 2016. Published by Oxford University Press for the Infectious Diseases Society of America. All rights reserved. For permissions, e-mail journals.permissions@oup.com. DOI: 10.1093/infdis/jiw361

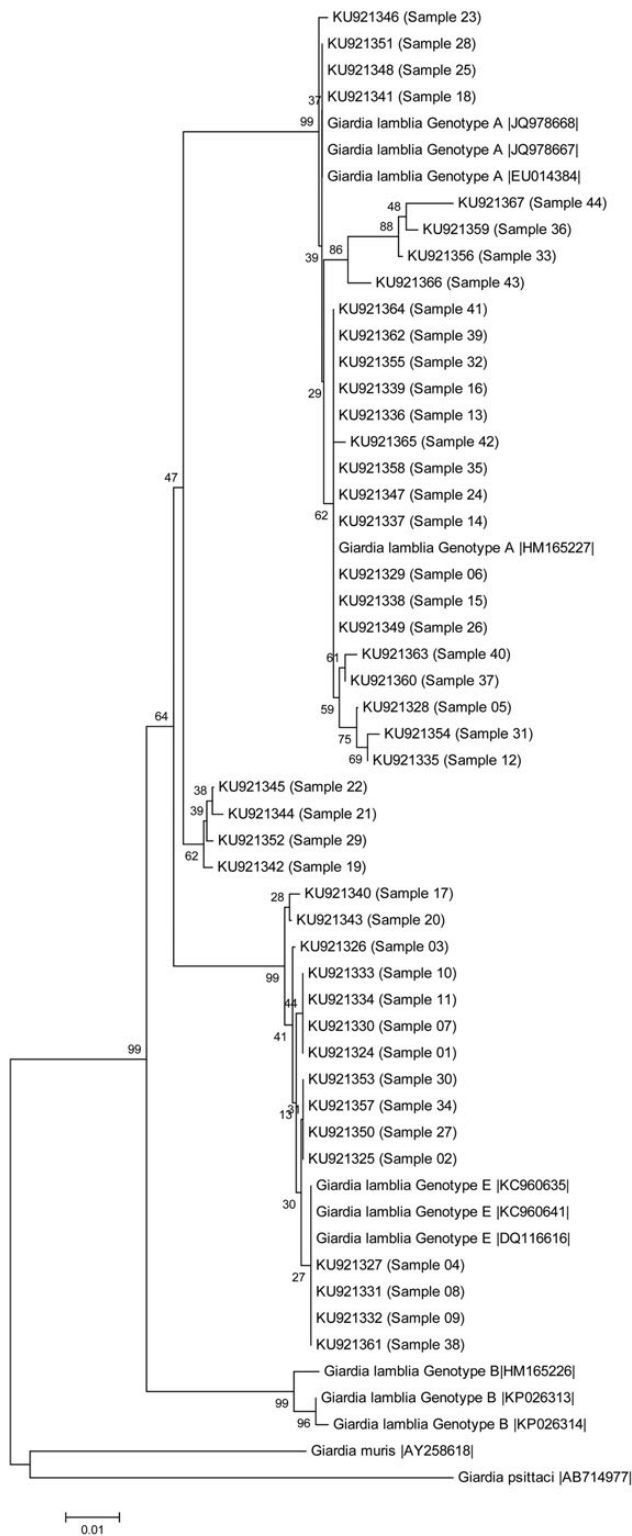

**Figure 1.** Phylogenetic tree of the *Giardia lamblia* isolates collected from children, based on sequences of the gene encoding  $\beta$ -giardin determined by a neighbor-joining algorithm, using a Kimura 2-parameter model. The sample numbers are indicated in parentheses. Sequences obtained from GenBank are indicated by their accession numbers. Values in the tree nodes represent bootstraps. The scale represents the distance in millions of years for the differentiation of each branch.

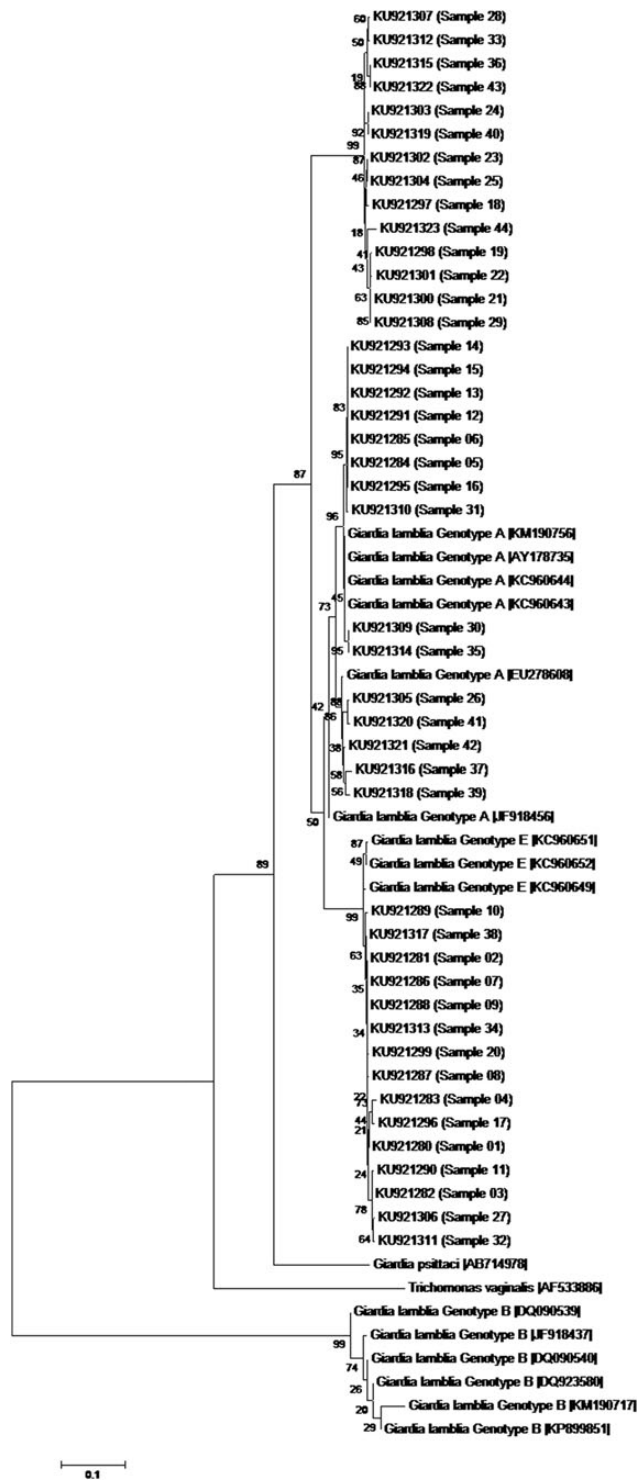

**Figure 2.** Phylogenetic tree of the *Giardia lamblia* isolates from children, based on sequences of the gene encoding glutamate dehydrogenase determined by a neighbor-joining algorithm, using a Kimura 2-parameter model. The sample numbers are indicated in parentheses. Sequences obtained from GenBank are indicated by their accession numbers. Values in the tree nodes represent bootstraps. The scale represents the distance in millions of years for the differentiation of each branch.

Prism BigDye Terminator Cycle Sequencing kit on an ABI 3730 automatic DNA sequencer (Applied Biosystems, Foster City, California). The obtained sequences were deposited in GenBank under accession numbers KU921280–KU921367.

Electropherograms were analyzed using Chromas 2.4 (Technelysium, South Brisbane, Australia); characterization of the sequences was performed using the nucleotide Basic Local Alignment Search Tool, and the contigs were obtained by the CAP3 Sequence Assembly Program. Nucleotide sequences of *gdh* and *βgia* were aligned by the Clustal W algorithm from Molecular Evolutionary Genetics Analysis (MEGA) 6.06 [9]. The phylogenetic analysis was performed using MEGA and the range estimation equations used were JIN and NEI (Kimura 2-parameter model). Phylogenetic trees were constructed using the neighbor-joining algorithm, with bootstrap analysis (1000 replicates). The sequences from the new isolates were aligned using reference sequences of *G. lamblia* from GenBank to genotype A (*gdh*: KC960643, AY178735, KM190756, EU278608, and JF918456; *βgia*: EU014384, HM165227, JQ978667, and JQ978668), genotype B (*gdh*: DQ090539, JF918437, DQ090540, DQ923580, KM190717, and KP899851; *βgia*: KP026314, HM165226, and KP026313), and genotype E (*gdh*: KC960649, KC960651, and KC960652; *βgia*: DQ116616, KC960635, and KC960641). The outgroups used were *Giardia psittaci* (*gdh*: AB714978; *βgia*: AB714977), *Giardia muris* (*βgia*: AY258618), and *Trichomonas vaginalis* (*gdh*: AF533886).

## RESULTS

### *G. lamblia* Frequency Among Children

Parasitological examination was performed in 35 employees and 89 preschoolers in the day-care unit. Fifty-four preschoolers were infected by at least 1 intestinal parasite, and 44 (49.4%) were positive for *Giardia* species. None of the employees were positive.

### Genotypic Characterization of *G. lamblia* Strains

A total of 44 samples positive for *G. lamblia* had their DNA isolated, and the conserved fragments of *βgia* and *gdh* were amplified and sequenced. For both *gdh* and *βgia*, 29 sequences were grouped in assemblage A, while 15 sequences were grouped in assemblage E (Figures 1 and 2). In both genes, the samples were grouped similarly, except samples 30 and 32, demonstrating the reproducibility of the arrangement showed by the 2 phylogenetic trees.

## DISCUSSION

Transmission of *G. lamblia* is favored by absence of sewage systems and water treatment. Additionally, close contact with stray animals or hoofed animals facilitates the occurrence of anthrozoonotic transmission cycles. These multiples sources increase the risk for *G. lamblia* infection and can explain the high prevalence of infection observed in the present study. Herein, the systematic genotyping of *Giardia* strains enabled us to identify assemblage E in human stool.

Previous studies conducted in Rio de Janeiro State demonstrated that genotype A was the most prevalent assemblage identified in humans [10]. As expected, 29 of 44 *G. lamblia* isolates were clustered as assemblage A by using *gdh* and *βgia* conserved genes. Assemblage B was not detected in our study, although it is frequently observed in humans in other regions [11]. Surprisingly, 15 sequences were grouped into assemblage E.

Since the establishment of the assemblage A–G classification, genotype E has been considered livestock specific [1]. Although the gene encoding *β-giardin* is the gene most indicated to determine assemblage E clustering, the gene encoding glutamate dehydrogenase has also been widely used. Through gene sequencing, assemblage E has been described in stool from cattle, sheep, rodent, and, more recently, from rabbits and nonhuman primates. Despite the tendency toward genetic homogeneity among isolates of the same assemblage, some reports have identified disagreements when all the sequences are compared [6]. *G. lamblia* has an intrinsic potential to mutate and generate some single-nucleotide polymorphisms, including on chromosome 4 [12]. Moreover, genotypes may vary according to the gene chosen for characterization, as occurred with samples 30 and 32 [6]. More recent descriptions indicate a change in the infective assemblage E profile and even the potential to infect human hosts, which has not been previously described [3, 13–15].

One might question why genotype E was not frequently identified in humans. In previous studies, few clusters were detected, and there was poor reproducibility between the multilocus genes chosen for analysis [4, 6]. It is widely accepted that genotype B is phylogenetically distant from genotypes A and E. However, the real phylogenetic distance between genotypes A and E is unclear. Because the *β-giardin* gene is considered most indicative of assemblage E clustering, it was chosen for constructing the phylogenetic trees. It is important to stress that *G. lamblia* assemblage samples were never sequenced in our laboratory, which could discharge contamination due to DNA manipulation. Multilocus analysis amplifying specific targets increases the likelihood of amplifying a mix of genotypes that, in turn, can be confirmed by multilocus strategy.

In conclusion, our results demonstrate that humans can be infected by an additional *G. lamblia* genotype belonging to assemblage E. Any relationship with epidemiology, symptoms, virulence, and pathogenesis of genotype E in humans needs to be investigated. Future genotype grouping studies using a higher number of samples from different species and the identification of other gene targets presenting a better discrimination potential could corroborate our results. It should be stressed that, similar to assemblage A, assemblage E may also present a zoonotic and anthrozoonotic profile.

### Supplementary Data

Supplementary materials are available at <http://jid.oxfordjournals.org>. Consisting of data provided by the author to benefit the reader, the posted

materials are not copyedited and are the sole responsibility of the author, so questions or comments should be addressed to the author.

## Notes

**Acknowledgments.** We thank the Sequencing Service DNA Sequencing Platform–PDTIS/Fundação Oswaldo Cruz and Nivea Oliveira (Laboratório de Parasitologia/FCM-UERJ) for providing parasitological examinations; Elizabeth Salgado and the nursery employees, for their support; and Dr Adeilton Brandão, for helpful discussion and manuscript revision.

**Financial support.** This work was supported by the Instituto Oswaldo Cruz/FIOCRUZ–Brazilian Ministry of Health (internal funds), CAPES (Brasil Sem Miséria/Brazilian governmental program fellowship to M. F.), and CNPq and FAPERJ (research fellowship to A. M. D.-C.).

**Potential conflicts of interest.** All authors: No reported conflicts. All authors have submitted the ICMJE Form for Disclosure of Potential Conflicts of Interest. Conflicts that the editors consider relevant to the content of the manuscript have been disclosed.

## References

1. Adam RD. Biology of *Giardia lamblia*. Clin Microbiol Rev **2001**; 14:447–75.
2. Lasek-Nesselquist E, Welch DM, Sogin ML. The identification of a new *Giardia duodenalis* assemblage in marine vertebrates and a preliminary analysis of *G. duodenalis* population biology in marine systems. Int J Parasitol **2010**; 40:1063–74.
3. Qi M, Xi J, Li J, Wang H, Ning C, Zhang L. Prevalence of zoonotic *Giardia duodenalis* assemblage B and first identification of assemblage E in rabbit fecal samples isolates from Central China. J Eukaryot Microbiol **2015**; 62:810–4.
4. Foronda P, Bargues MD, Abreu-Costa N, et al. Identification of genotypes of *Giardia intestinalis* of human isolates in Egypt. Parasitol Res **2008**; 103: 1177–81.
5. Cardona GA, de Lucio A, Bailo B, Cano L, de Fuentes I, Carmena D. Unexpected finding of feline-specific *Giardia duodenalis* assemblage F and *Cryptosporidium felis* in asymptomatic adult cattle in Northern Spain. Vet Parasitol **2015**; 209:258–63.
6. Cacciò SM, Beck R, Lalle M, Marinculic A, Pozio E. Multilocus genotyping of *Giardia duodenalis* reveals striking differences between assemblages A and B. Int J Parasitol **2008**; 38:1523–31.
7. Cacciò SM, De Giacomo M, Pozio E. Sequence analysis of the *beta-giardin* gene and development of a polymerase chain reaction–restriction fragment length polymorphism assay to genotype *Giardia duodenalis* cysts from human faecal samples. Int J Parasitol **2002**; 32:1023–30.
8. Lalle M, Jimenez-Cardosa E, Cacciò SM, Pozio E. Genotyping of *Giardia duodenalis* from humans and dogs from Mexico using a *beta-giardin* nested polymerase chain reaction assay. J Parasitol **2005**; 91:203–5.
9. Tamura K, Dudley J, Nei M, Kumar S. MEGA4: Molecular Evolutionary Genetics Analysis (MEGA) software version 4.0. Mol Biol Evol **2007**; 24:1596–9.
10. Volotão AC, Costa-Macedo LM, Haddad FS, Brandão A, Peralta JM, Fernandes O. Genotyping of *Giardia duodenalis* from human and animal samples from Brazil using *beta-giardin* gene: a phylogenetic analysis. Acta Trop **2007**; 102:10–9.
11. Oliveira-Arbex AP, David EB, Oliveira-Sequeira TC, Bittencourt GN, Guimarães S. Genotyping of *Giardia duodenalis* isolates in asymptomatic children attending daycare centre: evidence of high risk for anthroponotic transmission. Epidemiol Infect **2016**; 144:1418–28.
12. Cooper MA, Adam RD, Worobey M, Sterling CR. Population genetics provides evidence for recombination in *Giardia*. Curr Biol **2007**; 17:1984–8.
13. Trout JM, Santin M, Greiner E, Fayer R. Prevalence of *Giardia duodenalis* genotypes in pre-weaned dairy calves. Vet Parasitol **2004**; 124:179–86.
14. Thompson RC, Smith A, Lymbery AJ, Averis S, Morris KD, Wayne AF. *Giardia* in Western Australian wildlife. Vet Parasitol **2010**; 170:207–11.
15. Du SZ, Zhao GH, Shao JF, et al. *Cryptosporidium* spp, *Giardia intestinalis*, and *Enterocytozoon bieneusi* in captive non-human primates in Qinling Mountains. Korean J Parasitol **2015**; 53:395–402.
